1 **Examining the Persistence of Human Coronaviruses on Fresh Produce**

2 Madeleine Blondin-Brosseau<sup>1</sup>, Jennifer Harlow<sup>1</sup>, Tanushka Doctor<sup>1</sup>, and Neda Nasheri<sup>1, 2</sup>

3 1- National Food Virology Reference Centre, Bureau of Microbial Hazards, Health Canada,  
4 Ottawa, ON, Canada

5 2- Department of Biochemistry, Microbiology and Immunology, Faculty of Medicine,  
6 University of Ottawa, ON, Canada

7

8 Corresponding author: Neda Nasheri [neda.nasheri@canada.ca](mailto:neda.nasheri@canada.ca)

9

10

## 11 **Abstract**

12 Human coronaviruses (HCoVs) are mainly associated with respiratory infections. However, there  
13 is evidence that highly pathogenic HCoVs, including severe acute respiratory syndrome  
14 coronavirus 2 (SARS-CoV-2) and Middle East Respiratory Syndrome (MERS-CoV), infect the  
15 gastrointestinal (GI) tract and are shed in the fecal matter of the infected individuals. These  
16 observations have raised questions regarding the possibility of fecal-oral route as well as  
17 foodborne transmission of SARS-CoV-2 and MERS-CoV. Studies regarding the survival of  
18 HCoVs on inanimate surfaces demonstrate that these viruses can remain infectious for hours to  
19 days, however, to date, there is no data regarding the viral survival on fresh produce, which is  
20 usually consumed raw or with minimal heat processing. To address this knowledge gap, we  
21 examined the persistence of HCoV-229E, as a surrogate for highly pathogenic HCoVs, on the  
22 surface of commonly consumed fresh produce, including: apples, tomatoes and cucumbers.  
23 Herein, we demonstrated that viral infectivity declines within a few hours post-inoculation (p.i)  
24 on apples and tomatoes, and no infectious virus was detected at 24h p.i, while the virus persists  
25 in infectious form for 72h p.i on cucumbers. The stability of viral RNA was examined by  
26 droplet-digital RT-PCR (ddRT-PCR), and it was observed that there is no considerable reduction  
27 in viral RNA within 72h p.i.

## 28 **Keywords**

29 Human coronavirus, persistence, fecal-oral transmission, foodborne transmission, plaque assay,  
30 droplet-digital RT-PCR

31

## 32 **Introduction**

33 Coronaviruses that infect humans (HCoV) belong to alpha and beta genera of the *coronaviridae*  
34 family. Four common HCoVs (229E, OC43, HKU1, and NL63) are responsible for 10-30% of  
35 common cold symptoms that can be mild to moderate (18). SARS-CoV-2, which is responsible  
36 for the COVID-19 pandemic, is a betacoronavirus that uses angiotensin conversion enzyme 2  
37 (ACE-2) for entry. ACE-2 is abundantly expressed in the epithelium of the respiratory tract as  
38 well as the oral cavity, intestine and colon (12, 20). It is evident now that approximately 30-50%  
39 of COVID-19 patients demonstrate gastrointestinal symptoms including nausea, vomiting,  
40 diarrhea, and abdominal pain (4, 21, 36). SARS-CoV-2 RNA has been detected in more than  
41 50% of patients' stool specimens (2, 11, 27, 30), and several studies have confirmed that the virus  
42 detected in stool is infectious (31, 37). Moreover, persistent fecal viral shedding has been  
43 observed in pediatric patients (33) and there is direct evidence that SARS-CoV-2 can replicate  
44 productively in human enteroids and enterocytes (12, 36). More recently, it was demonstrated  
45 that multi-route mucosal inoculation (including oral inoculation) of African green monkeys with  
46 SARS-CoV-2 results in infection in both the respiratory and gastrointestinal tract (10), and orally  
47 inoculated golden Syrian hamsters develop respiratory and intestinal infection (3). Collectively,  
48 these observations suggest that fecal-oral transmission of SARS-CoV-2 is possible.

49 Although the primary route of transmission for HCoVs is inhalation of contaminated respiratory  
50 droplets and possible direct contact with contaminated fomites, there is concern that food could  
51 also act as a vehicle of transmission if contaminated with HCoVs. Food may become  
52 contaminated with HCoVs by contact with body secretions or fluids or by contact with soiled  
53 hands. Also, HCoVs may become aerosolized via talking, sneezing, or coughing of food-  
54 handlers and then be deposited on food surfaces. Food not only may act as a fomite, but can also

55 transport the virus to the potentially susceptible oral cavity and the GI tract (32). There is  
56 evidence that certain HCoVs including HCoV-229E and MERS can survive GI conditions  
57 including low pH, digestive enzymes and bile (38). If this is the case for SARS-CoV-2, the  
58 relatively high viral titre in stool and rectal swabs of the infected individuals could be explained  
59 by active viral replication in the GI tract. Furthermore, fecal-oral is the main route of  
60 transmission for enteric coronaviruses such as swine coronaviruses (26), canine coronaviruses (7),  
61 and equine coronavirus (19) , demonstrating that these viruses are not sensitive to the GI fluids.

62 Contamination of fresh produce may result in the transmission of not only the enteric viruses that  
63 are traditionally considered foodborne pathogens, but also possibly respiratory viruses such as  
64 adenoviruses, coronaviruses, and influenza viruses that can infect via contact with mucosal  
65 membranes {{640 O'Brien,B. 2020;}}. This is of particular concern for uncooked fruits and  
66 vegetables. Additionally, food handlers infected with respiratory viruses could still pose a  
67 potential health risk for food consumers, while preparing “cold foods” such as salads and  
68 sandwiches (34). Thus, it is imperative to examine the viral behaviour and inactivation in food  
69 and on food contact surfaces.

70 Since working with SARS-CoV-2 requires biosafety level 3 laboratory containment conditions,  
71 the use of surrogate HCoVs have been suggested to expand the current knowledge on  
72 coronavirus survival and inactivation under various conditions (9). For this reason, we chose  
73 HCoV-229E as a surrogate virus, since it has similar physicochemical properties to the more  
74 virulent HCoVs responsible for MERS and SARS (29). In this study, we examined the ability of  
75 HCoV-229E to retain infectivity on the surface of select fruits and vegetables, and thus obtained  
76 representative survival data that can be used to conduct risk assessments of SARS-CoV-2  
77 transmission via food.

## 78 **Materials and Methods**

### 79 **Cells and Viruses:**

80 HCoV-229E and human embryonic lung cell line MRC-5 were obtained from the American  
81 Type Culture Collection (CCL-171 and VR-740, respectively). Cells were grown at 37°C and  
82 5% CO<sub>2</sub> in culture media composed of Eagle's minimal essential medium, supplemented with  
83 0.23% (w/v) sodium bicarbonate, 500 µg/mL Penicillin-Streptomycin (ThermoFisher scientific),  
84 Glutamax-1, non-essential amino acids, and foetal bovine serum (FBS) 5% (v/v).

### 85 **Sample preparation:**

86 Three different produce types were tested: Royal Gala apples, Traditional Series tomatoes and  
87 English cucumbers (PLU code 4173, 4799 and 4593 respectively). Ten time points were  
88 selected, in triplicates: 0h, 0.5h, 1h, 2h, 4h, 6h, 16h, 24h, 48h and 72h. Each of the produce  
89 items was rinsed with water, dried with Kimwipes and disinfected with 70% ethanol. On the  
90 surface of each produce item, a 5cm by 5cm square was delimited using tape. This area was  
91 inoculated with 100µL of HCoV-229E (ATCC VR-740, 5×10<sup>5</sup> PFU/mL). The liquid was spread  
92 using the tip of the pipette, then allowed to fully dry for 1h. After the appropriate time lapse at  
93 ambient conditions (22°C; relative humidity, 30% to 40%), the surface was sampled with a  
94 cotton swab, which was then placed into the MRC-5 culture media previously described (17).  
95 Samples were processed immediately after swabbing.

### 96 **Viral quantification:**

97 - *plaque assay:*

98 Viral quantification and survival time were determined by plaque assay using MRC-5 cells. Cells  
99 were grown at 37 °C and 5% CO<sub>2</sub> in the culture medium previously described for up to three  
100 days, before being seeded, transferred into 12-well plates at a targeted concentration of 5×10<sup>5</sup>  
101 cells/mL and incubated to reach a confluency of 80-90%. Samples were diluted in culture  
102 medium and 100µL of at least two dilutions were used in duplicate to infect the prepared plates  
103 for 90 min at 35°C and 5% CO<sub>2</sub>. Plates were manually rocked every 10 min during the infection  
104 phase. Cells were then washed with phosphate buffered saline (PBS) and covered with 2mL of  
105 overlay media, composed of a 50/50 mix of 2× culture medium previously described and 0.5%  
106 agarose. Plates were incubated at 35°C and 5% CO<sub>2</sub> for 3-4 days. Cell monolayers were fixed  
107 using 3.7% paraformaldehyde for 4-24h, freed from overlay plugs by running under tap water  
108 and stained with 0.1% crystal violet for 20 min. Plaques were counted for each dilution to  
109 determine the viral titre.

110 - *Determining limit of detection*

111 Each produce item was artificially inoculated with a serial dilution of the viral stock in triplicate.  
112 At T<sub>0</sub>, the virus was extracted and assayed by plaque assay as described above. The plaques were  
113 counted for each dilution and results were analyzed to determine the highest dilutions (lowest  
114 titre) for which plaques were still obtained in triplicate experiments.

115 - *Recovery rate calculation*

116 The recovery efficiency was determined by calculating the ratio between the viral titre recovered  
117 at T<sub>0</sub> and the viral titre that was used to inoculate the sample.

118 Recovery rate (%):  $\frac{\text{obtained viral titre (PFU/mL)}}{\text{inoculated viral titre (PFU/mL)}} \times 100$

119 - *Estimating the decay rate:*

120 Viral decay rate was calculated as described previously (13). Briefly, linear regressions of the  
121 natural logarithm of virus abundance versus time (in hours) was calculated. The slope of the  
122 regressions represent the decay rate and when multiplied by 100, represent percentage of  
123 infectivity lost per hour. Viral half-life was calculated by dividing  $\ln(2)$  by the slope.

124 - *ddRT-PCR:*

125 For each produce item, all triplicates of 10 time points were tested. Viral RNA was isolated using  
126 a QIAamp viral RNA kit (QIAGEN) and diluted in sterile molecular biology grade water  
127 (Corning). The QX200 ddPCR system (Bio-Rad) was used for quantification and all PCR  
128 reactions were prepared using the One-Step RT-ddPCR Advanced Kit for Probes (Bio-Rad Cat#  
129 1864022). Primers used were previously described in (25): Forward primer 229E-FP (5-  
130 TTCCGACGTGCTCGAACTTT-3; GenBank accession no. M33560; nt 474 to 493) and reverse  
131 primer 229E-RP (5-CCAACACGGTTGTGACAGTGA-3; nt 523 to 543). A new probe that  
132 would complement the primers and be compatible with TaqMan qPCR requirements (ABI 7700  
133 Users Manual) was designed by using Integrated DNA Technologies (IDT) OligoAnalyzer tool.  
134 The new probe had the appropriate dissociation temperature and a minimal likelihood for duplex  
135 or hairpin formation: 229E-PR (5'-/56-  
136 FAM/TGCATTGAC/ZEN/CTCAGGATTCCATGCCC/3IABkFQ/-3'). Each PCR reaction  
137 contained 5 $\mu$ L of RNA, 1000 nmol/L of each primer, and 280 nmol/L of each probe. All samples  
138 were tested in duplicate. Droplets were generated using the QX200 droplet generator (Bio-Rad)  
139 according to the manufacturer's protocols, and PCR was performed using the following cycling  
140 conditions: an initial reverse transcription at 48°C for 30 min, followed by PCR activation at

141 95°C for 10 min and 45 cycles of amplification (15 s at 95°C and 1 min at 60°C). Droplets were  
142 detected in the QX200 droplet reader and analyzed using the Quantasoft version 1.7.4.0917 (Bio-  
143 Rad) software.

## 144 **Results**

### 145 **Recovery Efficiency from Produce**

146 As shown in Table 1, the recovery efficiency of HCoV-229E from all the tested commodities is  
147 well above 1%, with the highest recovery rate (10.8%) from tomatoes and the lowest (4.1%)  
148 from cucumbers. The limit of detection (LOD) for each commodity is determined as the lowest  
149 spiking concentration that produced plaques for all three replicates. As indicated in Table 2, the  
150 LOD was approximately 125 PFU for tomatoes and apples, and 50 PFU for cucumbers.

### 151 **Persistence of infectivity**

152 We artificially inoculated the surface of apples, tomatoes and cucumbers with  $5 \times 10^4$  PFU of  
153 HCoV-229E, which is consistent with the amount of virus that is typically exhaled by an infected  
154 individual (14). Figure 1 shows the persistence in infectivity of HCoV-229E at RT within 72 h  
155 p.i. The change in infectious viral titre is similar in apples and tomatoes with a progressive  
156 decline in infectivity up to 16h p.i. (Figure 1, Table 3). No infectious viral particles were isolated  
157 from tomatoes and apples at 24 h p.i., which demonstrates that viral infectivity is reduced below  
158 the LOD (i.e. >3 log reduction). However, infectious viral particles were detected on cucumbers  
159 up to 72 h p.i. Within the first 4 h p.i, viral infectivity reduces over 1 log on tomatoes and apples  
160 (1.18 and 1.27 log, respectively), while the reduction on cucumbers is only 0.75 log (Table 3).  
161 The reduction in infectivity is less than 2 log at 24 h p.i on cucumbers and by 72 h p.i. reaches  
162 approximately 2.5 log. No infectious viral particles were detected on cucumbers at 96 h p.i.



163 The median decay rate of HCoV-229E on apples and tomatoes was similar at 30%/h and 34%/h  
164 respectively, while the median decay rate on cucumbers was considerably lower at 7.7%/h. The  
165 median half-life of the virus on apples and tomatoes was 2.3h and 2.05h respectively and the  
166 median half-life on cucumbers was 9.05h (Table 4).

### 167 **Persistence of viral RNA**

168 We next set out to investigate the persistence of viral RNA on the examined produce over 72  
169 h.p.i. at ambient temperature. As demonstrated in Figure 2, no drastic reduction in viral RNA  
170 titre was observed over a 72h p.i. period. On apples, tomatoes, and cucumbers, viral RNA  
171 decreased by approximately 0.7 log, 0.5 log, and 0.3 log, respectively compared to  $T_0$ .  
172 Altogether, these observations demonstrate that viral RNA is more resistant to degradation  
173 compared to viral infectivity on the surface of produce.

### 174 **Discussion**

175 To date, there is no conclusive evidence of foodborne transmission of SARS-CoV-2, however,  
176 the traditional epidemiological foodborne investigation is unlikely to be employed with COVID-  
177 19 patients. For example, it is unlikely that infected people are asked to recall foods that they  
178 may have consumed during the period when they became infected. Without this information, any  
179 association between SARS-CoV-2 and foods cannot be made, and understanding the role of  
180 foodborne transmission remains elusive. Obtaining this epidemiological information would be  
181 helpful for efficient contact-tracing and source-tracking as more than 54% of COVID-19 patients  
182 can not recall how and where they contracted the virus (23).

183 Environmental persistence of HCoVs has been examined by different groups, who have obtained  
184 contradictory results (1). One study has shown that the stability of SARS-CoV-2 and SARS-

185 CoV-1 on dry surfaces at RT is similar, with no infectious virus being retrieved after 72h p.i.  
186 (24), while, Chin et al recovered infectious SARS-CoV-2 from plastic and stainless steel up to 7  
187 days p.i. (5). Keevil and coworkers reported that HCoV-229E remains infectious for 5 days at RT  
188 on a range of surface materials including glass and PVC, while it is rapidly inactivated on the  
189 surface of copper alloys (28). In another study, more relevant to this work, it was shown that the  
190 infectivity of HCoV-229E is completely abolished within 4 days p.i. on lettuce at 4°C (34).  
191 Recently, it was demonstrated that SARS-CoV-2 remains infectious on salmon at RT for 2 days  
192 (15). Herein, we only examined viral survival at ambient temperature and we have shown the  
193 infectivity of HCoV-229E is reduced to below LOD followed by 24h incubation on tomatoes and  
194 apples, and 96h on cucumbers.

195 At this point, we speculate that the longer survival on cucumbers compared to apples and  
196 tomatoes could be partly explained by the difference in surface pH of these commodities. The  
197 influence of pH on the stability of several coronaviruses has been studied and it has been shown  
198 that in general, coronaviruses are more stable at near neutral pH as compared to acidic or  
199 alkaline pH (1). As such, the near neutral surface pH of cucumbers (5.7), compared to the more  
200 acidic surface pH of tomatoes and apples (4.2 and 3.9, respectively), could be more suitable for  
201 the survival of HCoV-229E (16). It should also be noted that the LOD on cucumbers was lower  
202 compared to apples and tomatoes (50 PFU compared with 125 PFUs, respectively). Thus, it is  
203 possible that HCoV-229E remained infectious by 24 h p.i. on apples and tomatoes but the titre  
204 was below the LOD. However, the decay rate on cucumbers is considerably slower compared to  
205 apples and tomatoes (Figure 1 and Table 4), and the viral half-life on cucumbers is very close to  
206 the viral half-life on plastic (24) (9.05h and 9.04h, respectively). Further investigation is needed  
207 to determine whether the surface of apples and tomatoes has some virucidal properties, not found

208 on inanimate surfaces, that may lead to a more rapid viral inactivation. Thus, our results are in  
209 accordance with the previous findings that HCoV-229E lose their infectivity within a few days on  
210 inanimate surfaces at RT (22). Therefore, if produce becomes contaminated with HCoV-229E through  
211 irrigation or contaminated hands during pre- or post-harvest, while being stored at ambient  
212 temperature, the risk will be considerably reduced by the time it reaches the consumers.  
213 However, if the contamination occurs at the end of the food processing chain, for example by  
214 infected personnel in a restaurant setting, where the prepared food is consumed within a few  
215 minutes, there is a potential risk for infection. In such scenarios, the risk of super-spreading  
216 events is high as well (6, 35).

217 The persistence of viral RNA on the studied produce for several days despite the loss of  
218 infectivity, can be explained by the high environmental resilience of the coronavirus shell, which  
219 protects the viral genome (8).

220 It should be noted that our study involved experimental inoculation of fresh produce with HCoV-  
221 229E, and thus may not be fully representative of potential natural contamination. However, the  
222 infectious titre of virus used for inoculation of samples in the current study is representative of a  
223 worst-case scenario, if virus was found to be present on fresh produce. Herein, we attempted to  
224 address an important knowledge gap regarding the survival of human coronaviruses on fresh  
225 produce at ambient temperature. Potential foodborne transmission poses important public health  
226 implications and may partly explain the possible recurrence of the disease and its persistent  
227 transmission. Thus, our results could support more robust decision-making concerning risk  
228 assessment for foodborne transmission of human coronaviruses.

## 229 **Acknowledgements**

230 The authors would like to thank Dr. Brent Dixon and Dr. Franco Pagotto from the Bureau of  
231 Microbial Hazards for kindly reviewing the manuscript and providing insightful comments.

232 **References**

- 233 1. Aboubakr, H. A., T. A. Sharafeldin, and S. M. Goyal. 2020. Stability of SARS-CoV-2 and  
234 other coronaviruses in the environment and on common touch surfaces and the influence of  
235 climatic conditions: A review. *Transbound Emerg. Dis.* .
- 236 2. Cha, M. H., M. Regueiro, and D. S. Sandhu. 2020. Gastrointestinal and hepatic  
237 manifestations of COVID-19: A comprehensive review. *World J. Gastroenterol.* 26:2323-2332.
- 238 3. Chak-Yiu Lee, A., A. J. Zhang, J. Fuk-Woo Chan, C. Li, Z. Fan, F. Liu, Y. Chen, R. Liang,  
239 S. Sridhar, J. P. Cai, V. Kwok-Man Poon, C. Chung-Sing Chan, K. Kai-Wang To, S. Yuan, J.  
240 Zhou, H. Chu, and K. Y. Yuen. 2020. Oral SARS-CoV-2 inoculation establishes subclinical  
241 respiratory infection with virus shedding in golden Syrian hamsters. *Cell. Rep. Med.* 100121.
- 242 4. Cheung, K. S., I. F. Hung, P. P. Chan, K. C. Lung, E. Tso, R. Liu, Y. Y. Ng, M. Y. Chu, T.  
243 W. Chung, A. R. Tam, C. C. Yip, K. H. Leung, A. Yim-Fong Fung, R. R. Zhang, Y. Lin, H. M.  
244 Cheng, A. J. Zhang, K. K. To, K. H. Chan, K. Y. Yuen, and W. K. Leung. 2020. Gastrointestinal  
245 Manifestations of SARS-CoV-2 Infection and Virus Load in Fecal Samples from the Hong Kong  
246 Cohort and Systematic Review and Meta-analysis. *Gastroenterology* .
- 247 5. Chin, A. W. H., J. T. S. Chu, M. R. A. Perera, K. P. Y. Hui, H. L. Yen, M. C. W. Chan, M.  
248 Peiris, and L. L. M. Poon. 2020. Stability of SARS-CoV-2 in different environmental conditions.  
249 *Lancet Microbe* 1:e10-5247(20)30003-3. Epub 2020 Apr 2.
- 250 6. de Wit, M. A., M. A. Widdowson, H. Vennema, E. de Bruin, T. Fernandes, and M.  
251 Koopmans. 2007. Large outbreak of norovirus: the baker who should have known better. *J.*  
252 *Infect.* 55:188-193.

- 253 7. Decaro, N., C. Buonavoglia. 2011. Canine coronavirus: not only an enteric pathogen. *Vet.*  
254 *Clin. North Am. Small Anim. Pract.* 41:1121-1132.
- 255 8. Goh, G. K., A. K. Dunker, J. A. Foster, and V. N. Uversky. 2020. Shell disorder analysis  
256 predicts greater resilience of the SARS-CoV-2 (COVID-19) outside the body and in body fluids.  
257 *Microb. Pathog.* 144:104177.
- 258 9. Guillier, L., S. Martin-Latil, E. Chaix, A. Thebault, N. Pavio, S. Le Poder, C. Batejat, F.  
259 Biot, L. Koch, D. Schaffner, M. Sanaa, and Covid-19 Emergency Collective Expert Appraisal  
260 Group. 2020. Modelling the inactivation of viruses from the Coronaviridae family in response to  
261 temperature and relative humidity in suspensions or surfaces. *Appl. Environ. Microbiol.* .
- 262 10. Hartman, A. L., S. Nambulli, C. M. McMillen, A. G. White, N. L. Tilston-Lunel, J. R.  
263 Albe, E. Cottle, M. D. Dunn, L. J. Frye, T. H. Gilliland, E. L. Olsen, K. J. O'Malley, M. M.  
264 Schwarz, J. A. Tomko, R. C. Walker, M. Xia, M. S. Hartman, E. Klein, C. A. Scanga, J. L.  
265 Flynn, W. B. Klimstra, A. K. McElroy, D. S. Reed, and W. P. Duprex. 2020. SARS-CoV-2  
266 infection of African green monkeys results in mild respiratory disease discernible by PET/CT  
267 imaging and shedding of infectious virus from both respiratory and gastrointestinal tracts. *PLoS*  
268 *Pathog.* 16:e1008903.
- 269 11. Huang, C., Y. Wang, X. Li, L. Ren, J. Zhao, Y. Hu, L. Zhang, G. Fan, J. Xu, X. Gu, Z.  
270 Cheng, T. Yu, J. Xia, Y. Wei, W. Wu, X. Xie, W. Yin, H. Li, M. Liu, Y. Xiao, H. Gao, L. Guo,  
271 J. Xie, G. Wang, R. Jiang, Z. Gao, Q. Jin, J. Wang, and B. Cao. 2020. Clinical features of  
272 patients infected with 2019 novel coronavirus in Wuhan, China. *Lancet* 395:497-506.
- 273 12. Lamers, M. M., J. Beumer, J. van der Vaart, K. Knoops, J. Puschhof, T. I. Breugem, R. B.  
274 G. Ravelli, J. Paul van Schayck, A. Z. Mykytyn, H. Q. Duimel, E. van Donselaar, S. Riesebosch,

- 275 H. J. H. Kuijpers, D. Schippers, W. J. van de Wetering, M. de Graaf, M. Koopmans, E. Cuppen,  
276 P. J. Peters, B. L. Haagmans, and H. Clevers. 2020. SARS-CoV-2 productively infects human  
277 gut enterocytes. *Science* .
- 278 13. Long, A. M., S. M. Short. 2016. Seasonal determinations of algal virus decay rates reveal  
279 overwintering in a temperate freshwater pond. *ISME J.* 10:1602-1612.
- 280 14. Ma, J., X. Qi, H. Chen, X. Li, Z. Zhang, H. Wang, L. Sun, L. Zhang, J. Guo, L. Morawska,  
281 S. A. Grinshpun, P. Biswas, R. C. Flagan, and M. Yao. 2020. COVID-19 patients in earlier  
282 stages exhaled millions of SARS-CoV-2 per hour. *Clin. Infect. Dis.* .
- 283 15. Manman, D. e. a. 2020. Long-term survival of salmon-attached SARS-CoV-2 at 4°C as a  
284 potential source of transmission in seafood markets. *BioRxiv* .
- 285 16. McGlynn, W. The Importance of Food pH in Commercial Canning Operations. *Food*  
286 *technology fact sheet* .
- 287 17. Nasheri, N., J. Harlow, A. Chen, N. Corneau, and S. Bidawid. 2020. Evaluation of Bead-  
288 Based Assays in the Isolation of Foodborne Viruses from Low-Moisture Foods  
289 . *J. Food Prot.* 83:388-396.
- 290 18. Perlman, S., J. Netland. 2009. Coronaviruses post-SARS: update on replication and  
291 pathogenesis. *Nat. Rev. Microbiol.* 7:439-450.
- 292 19. Pusterla, N., R. Vin, C. M. Leutenegger, L. D. Mittel, and T. J. Divers. 2018. Enteric  
293 coronavirus infection in adult horses. *Vet. J.* 231:13-18.
- 294 20. Qian, Q., L. Fan, W. Liu, J. Li, J. Yue, M. Wang, X. Ke, Y. Yin, Q. Chen, and C. Jiang.  
295 2020. Direct evidence of active SARS-CoV-2 replication in the intestine. *Clin. Infect. Dis.* .

- 296 21. Scaldaferrri, F., G. Ianiro, G. Privitera, L. R. Lopetuso, L. M. Vetrone, V. Petito, D.  
297 Pugliese, M. Neri, G. Cammarota, Y. Ringel, G. Costamagna, A. Gasbarrini, I. Boskoski, and A.  
298 Armuzzi. 2020. The Thrilling Journey of SARS-CoV-2 into the Intestine: From Pathogenesis to  
299 Future Clinical Implications. *Inflamm. Bowel Dis.* .
- 300 22. Sizun, J., M. W. Yu, and P. J. Talbot. 2000. Survival of human coronaviruses 229E and  
301 OC43 in suspension and after drying on surfaces: a possible source of hospital-acquired  
302 infections. *J. Hosp. Infect.* 46:55-60.
- 303 23. Tenforde, M. W., E. Billig Rose, C. J. Lindsell, N. I. Shapiro, D. C. Files, K. W. Gibbs, M.  
304 E. Prekker, J. S. Steingrub, H. A. Smithline, M. N. Gong, M. S. Aboodi, M. C. Exline, D. J.  
305 Henning, J. G. Wilson, A. Khan, N. Qadir, W. B. Stubblefield, M. M. Patel, W. H. Self, L. R.  
306 Feldstein, and CDC COVID-19 Response Team. 2020. Characteristics of Adult Outpatients and  
307 Inpatients with COVID-19 - 11 Academic Medical Centers, United States, March-May 2020.  
308 *MMWR Morb. Mortal. Wkly. Rep.* 69:841-846.
- 309 24. van Doremalen, N., T. Bushmaker, D. H. Morris, M. G. Holbrook, A. Gamble, B. N.  
310 Williamson, A. Tamin, J. L. Harcourt, N. J. Thornburg, S. I. Gerber, J. O. Lloyd-Smith, E. de  
311 Wit, and V. J. Munster. 2020. Aerosol and Surface Stability of SARS-CoV-2 as Compared with  
312 SARS-CoV-1. *N. Engl. J. Med.* 382:1564-1567.
- 313 25. Vijgen, L., E. Keyaerts, E. Moes, P. Maes, G. Duson, and M. Van Ranst. 2005.  
314 Development of one-step, real-time, quantitative reverse transcriptase PCR assays for absolute  
315 quantitation of human coronaviruses OC43 and 229E. *J. Clin. Microbiol.* 43:5452-5456.
- 316 26. Wang, Q., A. N. Vlasova, S. P. Kenney, and L. J. Saif. 2019. Emerging and re-emerging  
317 coronaviruses in pigs. *Curr. Opin. Virol.* 34:39-49.



- 318 27. Wang, W., Y. Xu, R. Gao, R. Lu, K. Han, G. Wu, and W. Tan. 2020. Detection of SARS-  
319 CoV-2 in Different Types of Clinical Specimens. *JAMA* .
- 320 28. Warnes, S. L., Z. R. Little, and C. W. Keevil. 2015. Human Coronavirus 229E Remains  
321 Infectious on Common Touch Surface Materials. *mBio* 6:e01697-15.
- 322 29. Warnes, S. L., Z. R. Little, and C. W. Keevil. 2015. Human Coronavirus 229E Remains  
323 Infectious on Common Touch Surface Materials. *mBio* 6:e01697-15.
- 324 30. Wolfel, R., V. M. Corman, W. Guggemos, M. Seilmaier, S. Zange, M. A. Muller, D.  
325 Niemeyer, T. C. Jones, P. Vollmar, C. Rothe, M. Hoelscher, T. Bleicker, S. Brunink, J.  
326 Schneider, R. Ehmann, K. Zwirgmaier, C. Drosten, and C. Wendtner. 2020. Virological  
327 assessment of hospitalized patients with COVID-2019. *Nature* 581:465-469.
- 328 31. Xiao, F., J. Sun, Y. Xu, F. Li, X. Huang, H. Li, J. Zhao, J. Huang, and J. Zhao. 2020.  
329 Infectious SARS-CoV-2 in Feces of Patient with Severe COVID-19. *Emerg. Infect. Dis.*  
330 26:1920-1922.
- 331 32. Xu, H., L. Zhong, J. Deng, J. Peng, H. Dan, X. Zeng, T. Li, and Q. Chen. 2020. High  
332 expression of ACE2 receptor of 2019-nCoV on the epithelial cells of oral mucosa. *Int. J. Oral*  
333 *Sci.* 12:8-020-0074-x.
- 334 33. Xu, Y., X. Li, B. Zhu, H. Liang, C. Fang, Y. Gong, Q. Guo, X. Sun, D. Zhao, J. Shen, H.  
335 Zhang, H. Liu, H. Xia, J. Tang, K. Zhang, and S. Gong. 2020. Characteristics of pediatric SARS-  
336 CoV-2 infection and potential evidence for persistent fecal viral shedding. *Nat. Med.* 26:502-505.
- 337 34. Yepiz-Gomez, M. S., C. P. Gerba, and K. R. Bright. 2013. Survival of Respiratory Viruses  
338 on Fresh Produce. *Food Environ. Virol.* .

339 35. Zelner, J., C. Adams, J. Havumaki, and B. Lopman. 2020. Understanding the Importance  
340 of Contact Heterogeneity and Variable Infectiousness in the Dynamics of a Large Norovirus  
341 Outbreak. *Clin. Infect. Dis.* 70:493-500.

342 36. Zhou, J., C. Li, X. Liu, M. C. Chiu, X. Zhao, D. Wang, Y. Wei, A. Lee, A. J. Zhang, H.  
343 Chu, J. P. Cai, C. C. Yip, I. H. Chan, K. K. Wong, O. T. Tsang, K. H. Chan, J. F. Chan, K. K.  
344 To, H. Chen, and K. Y. Yuen. 2020. Infection of bat and human intestinal organoids by SARS-  
345 CoV-2. *Nat. Med.* .

346 37. Zhou, J., C. Li, X. Liu, M. C. Chiu, X. Zhao, D. Wang, Y. Wei, A. Lee, A. J. Zhang, H.  
347 Chu, J. P. Cai, C. C. Yip, I. H. Chan, K. K. Wong, O. T. Tsang, K. H. Chan, J. F. Chan, K. K.  
348 To, H. Chen, and K. Y. Yuen. 2020. Infection of bat and human intestinal organoids by SARS-  
349 CoV-2. *Nat. Med.* 26:1077-1083.

350 38. Zhou, J., C. Li, G. Zhao, H. Chu, D. Wang, H. H. Yan, V. K. Poon, L. Wen, B. H. Wong,  
351 X. Zhao, M. C. Chiu, D. Yang, Y. Wang, R. K. H. Au-Yeung, I. H. Chan, S. Sun, J. F. Chan, K.  
352 K. To, Z. A. Memish, V. M. Corman, C. Drosten, I. F. Hung, Y. Zhou, S. Y. Leung, and K. Y.  
353 Yuen. 2017. Human intestinal tract serves as an alternative infection route for Middle East  
354 respiratory syndrome coronavirus. *Sci. Adv.* 3:eaao4966.

355

356

357

358

359

360 **Figure legends**

361 **Figure 1.** Persistence of infectious HCoV-229E on commonly consumed fruits and vegetables.  
362 Approximately  $5 \times 10^4$  PFU HCoV-229E (100  $\mu$ l viral stock) was applied to the tested surface and  
363 incubated at ambient conditions (22°C; relative humidity, 30% to 40%). Virus was extracted and  
364 assayed for infectivity at various time points as described in the text. The data represent the  
365 average of three independent experiments. Error bars represent standard deviation.

366 **Figure 2.** Persistence of viral RNA on commonly consumed fruits and vegetables.  
367 Approximately  $2 \times 10^8$  RNA copies of HCoV-229E (100  $\mu$ l of viral stock) was applied to the  
368 tested surface and incubated at ambient conditions (22°C; relative humidity, 30% to 40%). Virus  
369 was extracted at indicated time points and viral RNA was quantified by ddRT-PCR. The data  
370 represent the average of three independent experiments. Error bars represent standard deviation.

371

372 **Table 1.** Recovered viral titre at T<sub>0</sub> and recovery rate in percentage for each produce type. The  
373 results are the mean of 3 independent experiments.

| Produce  | Titer at T <sub>0</sub><br>(PFU/mL) | Recovery rate<br>(%) |
|----------|-------------------------------------|----------------------|
| Apple    | 1.45E+03                            | 5.81                 |
| Tomato   | 2.69E+03                            | 10.77                |
| Cucumber | 1.20E+03                            | 4.09                 |

374

375

376 **Table 2.** Detection of HCoV-229E on the surface of different produce. Samples were inoculated  
377 with 10<sup>4</sup> to 10<sup>1</sup> PFU of HCoV-229E and examined by plaque assay at T<sub>0</sub>. ND is not detected.

| Produce  | Viral Inoculum (PFU) |      |     |     |     |     |    |
|----------|----------------------|------|-----|-----|-----|-----|----|
|          | 10,000               | 1000 | 500 | 250 | 125 | 50  | 10 |
| Apple    | 3/3                  | 3/3  | 3/3 | 3/3 | 3/3 | ND  | ND |
| Tomato   | 3/3                  | 3/3  | 3/3 | 3/3 | 3/3 | 2/3 | ND |
| Cucumber | 3/3                  | 3/3  | 3/3 | 3/3 | 3/3 | 3/3 | ND |

378

379 **Table 3.** Log reduction in viral titre compared to T<sub>0</sub>. The results are the mean of 3 independent  
380 experiments ± Standard Deviation.

| Time point | Apples    | Tomatoes  | Cucumbers  |
|------------|-----------|-----------|------------|
| 0.5h       | 0.09±0.01 | 0.09±0.05 | 0.10±0.01  |
| 1h         | 0.23±0.06 | 0.14±0.04 | 0.33±0.11  |
| 2h         | 0.90±0.12 | 0.68±0.05 | 0.38±0.11  |
| 4h         | 1.08±0.18 | 1.05±0.02 | 0.76±0.01  |
| 6h         | 1.27±0.08 | 1.18±0.06 | 0.79±0.04  |
| 16h        | 2.40±0.33 | 2.37±0.09 | 1.26±0.06  |
| 24h        | 3.16      | 3.43      | 1.92±0.15  |
| 48h        | 3.16      | 3.43      | 2.09±0.16  |
| 72         | 3.16      | 3.43      | 2.48±0.035 |

381

382

383 **Table 4.** Decay rate (DR) in percentage and viral half-life (HL) in hours (h) on each produce  
384 type. The results are the median of 3 independent experiments ± Standard Deviation.

385

|          | DR (%)  | HL (h)    |
|----------|---------|-----------|
| Apple    | 30±0.25 | 2.3±0.02  |
| Tomato   | 34±0.1  | 2.05±0.06 |
| Cucumber | 7.7±0.6 | 9.05±0.75 |

386

387 **Figure 1**

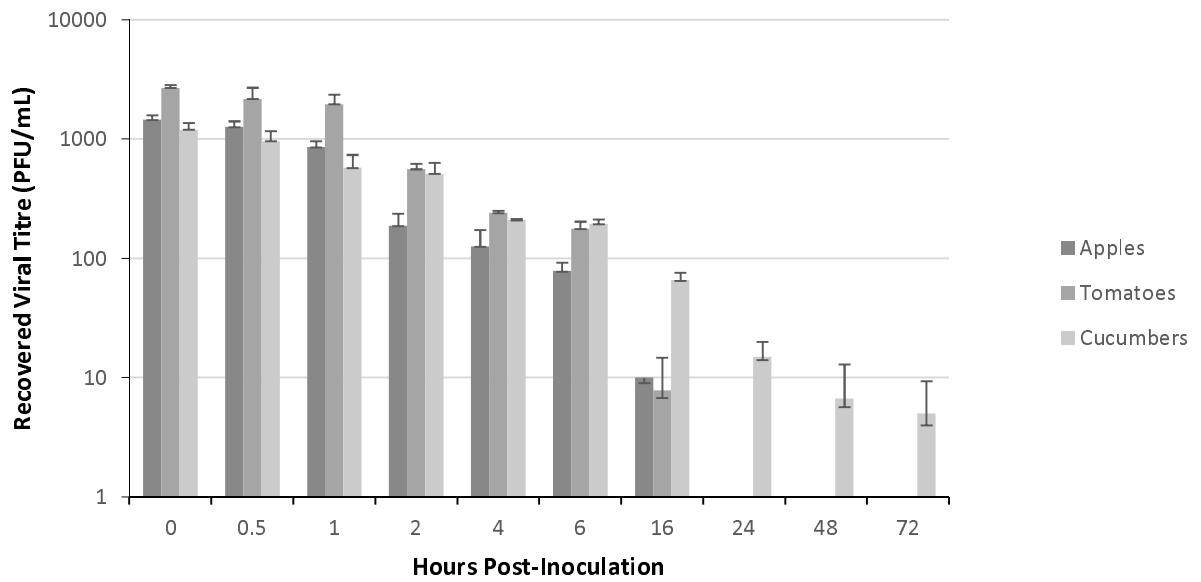

388

389

390 **Figure 2.**

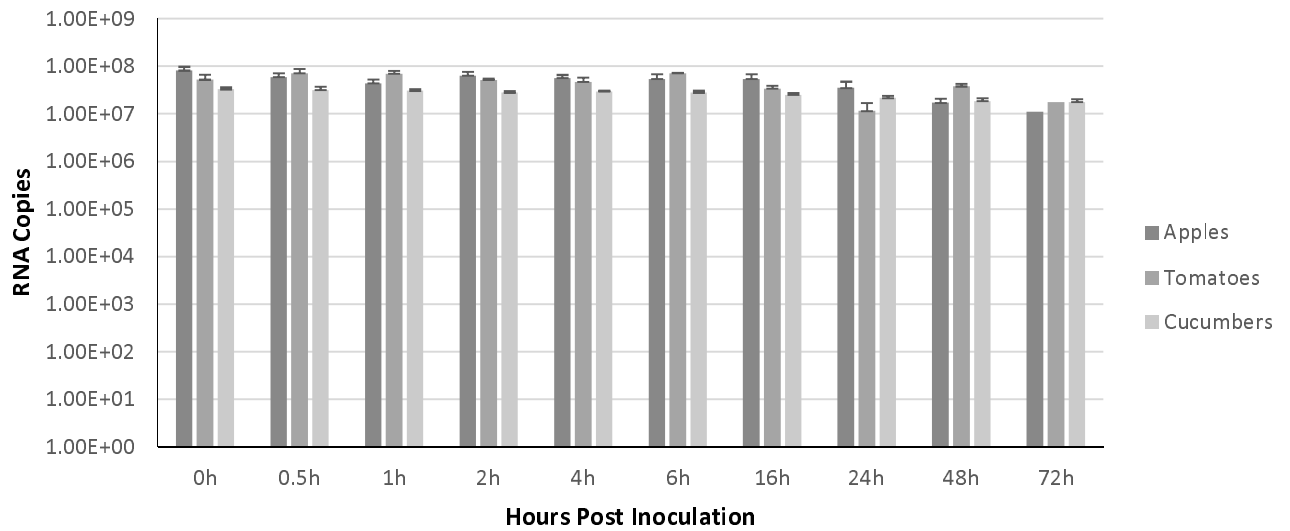

391

392
